1 **In vitro pancreatic islet cluster expansion facilitated by hormones and chemicals**

2

3

4 Jing-Yu Lin<sup>#1</sup>, Jie Cheng<sup>#1</sup>, Ya-Qin Du<sup>#2</sup>, Wei Pan<sup>#1</sup>, Zhong Zhang<sup>3</sup>, Jin Wang<sup>4</sup>, Jie An<sup>4</sup>, Fan  
5 Yang<sup>4</sup>, Yun-Fei Xu<sup>6</sup>, Hui Lin<sup>1</sup>, Wen-Tao An<sup>1</sup>, Jia Wang<sup>5</sup>, Zhao Yang<sup>5</sup>, Ren-Jie Chai<sup>3</sup>, Xue-Ying  
6 Sha<sup>2</sup>, Hui-Li Hu<sup>\*7</sup>, Jin-Peng Sun<sup>\*2,5</sup> and Xiao Yu<sup>\*1</sup>

7

8

9 **Author details**

10 <sup>1</sup>Key Laboratory Experimental Teratology of the Ministry of Education and Department of  
11 Physiology, School of Basic Medical Sciences, Shandong University, 250012 Jinan, China

12 <sup>2</sup>Department of Physiology and Pathophysiology, School of Basic Medical Sciences, Peking  
13 University, Key Laboratory of Molecular Cardiovascular Science, Ministry of Education,  
14 100191 Beijing, China

15 <sup>3</sup>Key Laboratory for Developmental Genes and Human Disease of the Ministry of Education,  
16 School of Life Science and Technology, Southeast University, 210096 Nanjing, China

17 <sup>4</sup>Department of Pharmacology, School of Basic Medical Sciences, Shandong University,  
18 250012 Jinan, China

19 <sup>5</sup>Key Laboratory Experimental Teratology of the Ministry of Education and Department of  
20 Biochemistry and Molecular Biology, School of Basic Medical Sciences, Shandong  
21 University, 250012 Jinan, China

22 <sup>6</sup>Key Laboratory Experimental Teratology of the Ministry of Education and Department of  
23 Biochemistry and Molecular Biology, Shandong University School of Medicine, 250012 Jinan,  
24 China

25 <sup>7</sup>The Key Laboratory of Experimental Teratology, Ministry of Education and Department of  
26 Genetics, School of Basic Medical Sciences, Shandong University, 250012 Jinan, China

27

28 <sup>#</sup>These authors contributed equally to this work

29 <sup>\*</sup>Corresponding author: Xiao Yu (corresponding author)

30 E-mail: yuxiao@sdu.edu.cn

31 Jin-Peng Sun (corresponding author)

32 E-mail: sunjinpeng@bjmu.edu.cn

33 Hui-Li Hu (corresponding author)

34 E-mail: huhuili@sdu.edu.cn

35

36 **Abstract**

37 Tissue regeneration, such as pancreatic islet tissue propagation in vitro, could serve as a  
38 promising strategy for diabetes therapy and personalized drug testing. However, such a

39 protocol has not been realized yet. Propagation could be divided by two steps, which are: (1)  
40 expansion in vitro and (2) repeat passaging. Even the in vitro expansion of the islet has not  
41 been achieved to date. Here, we describe a method to enable the expansion of islet clusters  
42 isolated from pregnant mice or wild-type rats by employing a combination of specific  
43 regeneration factors and chemical compounds in vitro. The expanded islet clusters expressed  
44 insulin, glucagon and somatostatin, which are markers corresponding to pancreatic  $\beta$  cells,  $\alpha$   
45 cells and  $\delta$  cells, respectively. These different types of cells grouped together, were spatially  
46 organized and functioned similarly to primary islets. Further mechanistic analysis revealed  
47 that forskolin in our recipe contributed to renewal and regeneration, whereas exendin4 was  
48 essential for preserving islet cell identity. Our results provide a novel method for the in vitro  
49 expansion of islet clusters, which is an important step forward in developing future protocols  
50 and medium used for islet tissue propagation in vitro. Such method is important for future  
51 regenerative diabetes therapies and personalized medicine using large amounts of pancreatic  
52 islets derived from the same person.

53

## 54 **Introduction**

55 Diabetes is characterized by insulin resistance and dysfunctional insulin secretion. Recent  
56 progress in the generation of functional insulin-producing pancreatic  $\beta$  cells from stem cells  
57 differentiation or transdifferentiation in vitro has shed light on cell-replacement therapies for  
58 the treatment of diabetes<sup>1-4</sup>. However, compared to tissue/organ replacement therapy derived  
59 from somatic islets of the same person for curing diabetes<sup>5,6</sup>, these methods still have the  
60 following deficits: (1) The function of a tissue, such as pancreatic islets, cannot be fully  
61 substituted by a single  $\beta$  cell type. Islets contain at least three main cell types, and together,  
62 they contribute the functional integrity adaptations to responses to different physiological  
63 changes<sup>7-10</sup>. In fact, recent reports indicate the essential roles of the islet circuit in maintaining  
64 glucose metabolism homeostasis<sup>7,10</sup>. (2) The identity of the  $\beta$  cells generated from  
65 transdifferentiation or stem cells is not defined, and their functions are not guaranteed. These  
66 cells normally have different gene expression patterns or certain mutations compared to  
67 somatic  $\beta$  cells. (3) Some of the  $\beta$ -like cells generated from stem cells may still have  
68 pluripotency potential, which may correlate to a risk of tumour development. (4) Finally,  
69 these cells may elicit unwanted immune responses.

70 Ideally, propagating islets isolated from the same patient to the desired number and then  
71 transplanting them into the patient is a promising regenerative strategy for diabetes therapy

72 with benefits that stem cell or transdifferentiation based cell-replacement treatment cannot  
73 match. This method will minimize the immune response, decrease the identity difference and  
74 result in a better ability to adapt to different growth niche after transplantation. In addition,  
75 the organoids generated from pancreatic islets propagated from patients can be used for drug  
76 testing because they mostly modelling composition, architecture and function of primary  
77 tissue. Recently, significant progress has been made in which somatic intestinal, gastric,  
78 colonal, hepatic and pancreatic ducts were cultured and propagated to organoids *in vitro*<sup>11-19</sup>,  
79 which lays the foundation for future regenerative therapy. However, these organoids mostly  
80 exhibit epithelial properties and are difficult to be induced into endocrine cells. Thus, the *in*  
81 *vitro* propagation of functional endocrine organoids especially islets, is still required to be  
82 established.

83 Propagation of islets could be divided by two processes: 1) expansion of the islet cells in  
84 *vitro*. 2) Propagating the expanded islet cells by multiple passages. Here, we reported a  
85 method for 3D culture with a novel special medium recipe that enabled the *in vitro* expansion  
86 of pancreatic islet clusters isolated from pregnant mice or wild-type rats. Further mechanistic  
87 analysis suggested that forskolin (FSK) in the recipe is required for maintaining cell renewal  
88 and regeneration, whereas exendin4 is essential for preserving islet identity. Therefore, our  
89 results identified a method allowed an *in vitro* expansion of the pancreatic islet clusters,  
90 which could be a key step for propagating patient-specific pancreatic islets for future  
91 regenerative diabetes therapy.

92

## 93 **Results**

### 94 **Recipe for the *in vitro* pancreatic islet expansion medium (PIEM)**

95 To identify the optimal conditions for pancreatic islet expansion *in vitro*, we reviewed the  
96 chemicals, proliferation and regeneration factors used in the culture of other organoids, such  
97 as those in pancreatic ducts, cholangiocytes and hepatocytes<sup>14,16,20,21</sup>, and pancreatic islet  
98 organoids derived from stem cells or fibroblasts (Fig. 1)<sup>1-4</sup>. According to their reported  
99 functions, these chemicals and factors are classified into the following groups: islet identity,  
100 cell division and proliferation, and cell renewal and regeneration (Fig. 1). By screening  
101 different combinations of compounds and factors, a medium composed of 12 chemicals and  
102 hormones, as well as the general nutrient nicotinamide, B27 and GlutaMAX, was created and  
103 was found to robustly support the *in vitro* expansion of dispersed islet clusters isolated from

104 pregnant mice or wild-type rats. We named this in vitro pancreatic islet expansion medium  
105 PIEM.

106

### 107 **Expansion of mouse islet clusters in vitro**

108 Previous studies have shown that pregnant mouse islets maintain expansion ability in vivo,  
109 whereas wild-type mouse islets undergo little expansion<sup>22,23</sup>. We therefore used islets from  
110 both pregnant and wild-type mice, as pregnant mice could serve as an easier starting point for  
111 investigating the regeneration process. We isolated pancreatic islets from both wild-type and  
112 pregnant C57BL/6 mice by collagenase P perfusion, sedimentation and handpicking. These  
113 pancreatic islets were separated into single cells or cell clusters by dispase II digestion and  
114 mechanical dissociation. The single cells or cell clusters were cultured in 3-dimensional (3D)  
115 Matrigel. Only dispersed islet clusters isolated from pregnant mice showed significant  
116 expansion during nine-day culture (Fig. 2a). Approximately 5~15% of the pancreatic islet  
117 clusters isolated from pregnant mice were able to expand from a surface area of 6,000-9,000  
118  $\mu\text{m}^2$  (240-320 cells) to a surface area of 20,000-30,000  $\mu\text{m}^2$  (1300-2100 cells) (Fig. 2a, c). In  
119 contrast, the dispersed single islet cells from pregnant or wild-type mice or islet clusters from  
120 wild-type mice showed no significant expansion (Fig. 2b, d).

121 We next used qRT-PCR to examine the expression of key islet markers in the expanded  
122 islet clusters. The expanded islet clusters maintain expression of the crucial pancreatic  $\beta$  cell  
123 markers *insulin-1* (*Ins1*), *insulin-2* (*Ins2*) and *Mafa*; the  $\alpha$  cell markers *glucagon* (*Gcg*) and  
124 *Mafb*; and the  $\delta$  cell marker *somatostatin* (*Sst*) (Fig. 2e).

125 To confirm that specific cell types coexisted in the in vitro expanded islet clusters, which is  
126 a hallmark of expanded islet clusters, we performed immunostaining for INSULIN,  
127 GLUCAGON and SOMATOSTATIN, which are markers for pancreatic  $\alpha$  cells,  $\beta$  cells and  $\delta$   
128 cells, respectively. The result unambiguously identified that glucagon, insulin, and  
129 somatostatin staining was present in different cells grouped together in the same expanded  
130 islet clusters similar to primary islets (Fig. 3a, b and Supplementary Fig. S1a, b). The  
131 percentage of the  $\alpha$  cells,  $\beta$  cells and  $\delta$  cells are (12.4 $\pm$ 3.67)%, (78 $\pm$ 4.55)%, (7.68 $\pm$ 1.26)%  
132 respectively in propagated islet clusters, which is similar to the pancreatic islets isolated from  
133 pregnant mice (Fig. 3c). Importantly, we also observed the co-localization of the pancreatic  
134 transcription factors PDX1 and MAFA with the insulin, as well as the partial co-localization  
135 of the NKX6.1 with the insulin in the same cells of expanded islet clusters, which is similar to  
136 the pancreatic islets isolated from pregnant mice (Fig. 3d-f and Supplementary Fig. S1c-e).

137 We next examined the functional integrity of the expanded islet clusters. In response to  
138 combined stimulation with 20 mM glucose and 100 nM GLP-1, the expanded islet clusters  
139 demonstrated a significant increase in insulin secretion, although with a smaller extent

140 compared to the pregnant mouse islets (Fig. 3g). In response to high glucose stimulation, both  
141 other labs and our lab have shown that UCN3 serves an endogenous paracrine factor secreted  
142 by pancreatic  $\beta$  cells to stimulate endogenous somatostatin secretion from pancreatic  $\delta$   
143 cells<sup>7,10,24</sup>. We therefore stimulated the expanded islet clusters with both glucose and UCN3 to  
144 minimize the amount required for islet cluster usage. The in vitro expanded islet clusters  
145 displayed significantly more somatostatin release in response to glucose and UCN3  
146 stimulation (Fig. 3h). Moreover, the expanded islet clusters secreted more glucagon in  
147 response to 25mM Arginine stimulation, hallmarking the normal function of pancreatic islet  $\alpha$   
148 cells, which is similar to the pregnant mouse islets (Fig. 3i). These results confirmed the  
149 functional integrity of the in vitro expanded islet clusters isolated from pregnant mice.

150 Although the expanded pancreatic islet clusters showed similar SST and Glucagon  
151 secretion compared to the primary isolated islets in response to specific physiological  
152 stimulations, it is worth to note that their insulin secretion in response to the combined  
153 stimulation of glucose and GLP-1 is significantly weakened. Some extent degeneration during  
154 the islet expansion may occur during current in vitro expansion condition, which awaits for  
155 further investigation and methods optimization in our future work.

156

#### 157 **Expansion of rat islet clusters in vitro**

158 We then examined the expansion of the dispersed rat islet single cells and clusters in PIEM.  
159 Similar to those from pregnant mice, approximately 5~15% of the rat pancreatic islet clusters  
160 were able to expand from a surface area of 5,000-8,000  $\mu\text{m}^2$  (200~350 cells) to a surface area  
161 of 20,000-25,000  $\mu\text{m}^2$  (1,000~1,900 cells), whereas dispersed rat islet single cells showed no  
162 such expansion ability (Fig. 4a, b). Furthermore, qRT-PCR revealed that the expanded rat islet  
163 clusters maintained the same expression of the  $\alpha$  cell markers *Gcg* and *Mafb* as the primary  
164 rat islets but showed significantly higher expression of the  $\beta$  cell markers *Ins-1*, *Ins-2* and  
165 *Mafa* and the  $\delta$  cell marker *Sst* (Fig. 4c).

166

#### 167 **Increased gene expression related to dedifferentiation, pluripotency and proliferation in** 168 **expanded islet clusters**

169 We next examined whether the expanded islet clusters increased the expression level of  
170 genes functionally associated with cell proliferation, renewal and regeneration, which are  
171 important factors for in vitro regeneration. Importantly, significantly higher expression of  
172 *Ki67*, *Ccnd1* and *Pcna* was found in expanded islet clusters than in islets derived from  
173 pregnant mice or wild-type rats, highlighting the increased proliferation ability of the  
174 expanded islet clusters (Fig. 5a, d). Moreover, significantly higher *Nanog* and *Sox9*  
175 expression were found in expanded islet clusters derived from both pregnant mice and rats  
176 (Fig. 5b, e). These results provide putative explanations accounting for the better proliferation

177 and renewal abilities of isolated islet clusters than integral islets.

178 We suspected that these islets gained proliferation and pluripotency due to dedifferentiation.  
179 Thus, we examined dedifferentiation markers in expanded islet clusters and compared them  
180 with those in isolated pancreatic islets. Interestingly, the expanded islet clusters showed  
181 significantly higher expression of *Ngn3* and *Hlx9*, markers that characterize pancreatic islet  
182 progenitor cells (Fig. 5c, f). Although the expanded islet clusters derived from pregnant mice  
183 showed higher expression of *Gata6*, they showed decreased expression of *Gata4*, both of  
184 which are pancreatic progenitor markers (Fig. 5c, f). The protein expression of KI67 and  
185 SOX9 in expanded islet clusters were confirmed by immunofluorescence, higher than in  
186 primary islets (Supplementary Fig. S2a-d). Similarly, the expanded islet clusters derived from  
187 rats did not display significant pancreatic progenitor characteristics, as they showed decreased  
188 expression of *Gata6* (Fig. 5c, f). The data suggested that these expanded islet clusters  
189 underwent one-step dedifferentiation towards islet progenitor cells, but they did not ultimately  
190 reach the pancreatic progenitor cell stage. Taken together, this one-step dedifferentiation of  
191 isolated islet clusters cultured in PIEM towards pancreatic islet progenitor cells contributed to  
192 the gain of cell proliferation, renewal and regeneration functions of expanded islet clusters.

193

#### 194 **Essential role of FSK and exendin4 in PIEM**

195 During our formula component screening and recipe formation for PIEM, we identified that  
196 FSK and exendin4 are both required for robust islet cluster expansion in vitro. It is known that  
197 exendin4 induced cAMP accumulation after it activates GLP-1R and downstream Gs  
198 proteins<sup>25</sup>. FSK is known as a cAMP agonist through direct binding to adenylyl cyclase<sup>26</sup>.  
199 Moreover, recent reports indicate that FSK is required for proliferation of liver organoids in  
200 addition to A83-01<sup>27</sup>. Interestingly, removing FSK or exendin4 from PIEM has different  
201 effects on the gene expression profiles of islet identity, proliferation, renewal and regeneration  
202 markers. Removing FSK from PIEM had partial effects on islet identity and cell proliferation  
203 markers, including decreased expression of *Mafa*, *Sst* and *Ccnb1* (Fig. 6a, b). In particular,  
204 FSK was required for the expression of cell renewal and regeneration markers, including  
205 *Nanog* and *Sox17* (Fig. 6c). In contrast, exendin4 was essential for islet identity and  
206 proliferation because it maintained the expression of the pancreatic  $\beta$  cell markers *Ins-1*, *Pdx1*  
207 and *Mafa* and the proliferation markers *Ki67*, *Ccnb1* and *Cdk4* (Fig. 6a, b). In particular,  
208 exendin4 was required for the expression of *Ngn3* and *Hlx9*, two islet progenitor markers  
209 (Fig. 6d). These results indicated that FSK in PIEM renders cell renewal and regeneration  
210 ability to isolated islet clusters, whereas exendin4 is essential for maintaining islet  $\beta$  cell  
211 identity, proliferation and dedifferentiation.

212

213

## 214 Discussion

215 The in vitro expansion of primary pancreatic  $\beta$  cells or pancreatic islet tissues has not been  
216 reported before. Here, we developed a medium recipe, which we named PIEM, that enabled  
217 the proliferation of dispersed islet clusters isolated from pregnant mice or wild-type rats in  
218 vitro (Fig. 7). Isolated islet clusters normally grow from an initial surface area of 5,000-9,000  
219  $\mu\text{m}^2$  to a surface area of 20,000-30,000  $\mu\text{m}^2$ , with an estimated 5~8-fold increase in cell  
220 number. Compared to primary pancreatic islets, expanded cell clusters have similar or higher  
221 mRNA expression levels of insulin, glucagon and somatostatin, which are markers of  
222 pancreatic  $\beta$  cells,  $\alpha$  cells and  $\delta$  cells, respectively. Expanded islet clusters demonstrated  
223 normal insulin and somatostatin secretion in response to physiological stimulation and normal  
224 glucagon secretion in response to amino acids, suggesting that the clusters recapitulate  
225 specific functions of pancreatic islets. Immunostaining further confirmed that the cells  
226 expressing insulin, glucagon and somatostatin were grouped together and spatially organized  
227 in expanded islet clusters similar to primary islets. These data indicated that the expanded  
228 islet clusters behave similar to an in vitro organoid, thus serving as an initial step for future  
229 islet propagation methods developing in vitro. The ultimate goal of developing efficient  
230 methods for propagation islets in vitro is to fulfil the demand for regenerative diabetes  
231 therapy and personalized drug tests.

232 It is worth noting that we observed the expansion of islet clusters isolated from only  
233 pregnant mice and wild-type rats in PIEM, not those isolated from wild-type mice. Pregnant  
234 mice are well known for their increased pancreatic  $\beta$  cell proliferation<sup>28-31</sup>, which provides a  
235 useful starting point for testing medium recipes. Although we did not observe the  
236 proliferation of islet clusters isolated from wild-type mice, we did observe the expansion of  
237 islet clusters isolated from wild-type rats, which share more properties identical to human  
238 islets than mouse islets. An urgent need is to test whether PIEM enables the expansion of  
239 primary islet clusters isolated from human patients.

240 Another notable observation is that only dispersed islet clusters were able to proliferate in  
241 vitro, whereas dispersed single primary islet cells could not. Two important factors may  
242 contribute to this discrepancy. First, the islet clusters contain multiple cell types, which are  
243 not only the origins of the different cell types in the finally expanded islet clusters but also  
244 may form certain cell circuits and gradient hormone concentrations to support in vitro  
245 expansion. Second, primary single cells must undergo harsher digestion than islet clusters,  
246 which means that the extracellular parts of the membrane or matrix proteins, including  
247 receptors, ion channels and transporters, may be digested and their function impaired. These  
248 membrane or matrix proteins may be key for in vitro tissue expansion. Therefore, future  
249 analysis of the different expression patterns and functions of membrane proteins and  
250 signalling circuit differences between isolated islet clusters and single cells may provide more

251 clues for unravelling the secrets of the in vitro expansion of islets and provide guidance for a  
252 better strategy for in vitro islet cluster expansion.

253 We noticed that expanded islet clusters have higher expression of *Ngn3* and *Hlxb9*, which  
254 are markers of pancreatic islet progenitor cells. Although the *Nanog* in islet clusters increased  
255 approximately 10 fold compared to normal islets, however, this level is more mimic the whole  
256 embryo tissue but much lower (more than 1,000 fold lower) than the embryo stem cells  
257 (Supplementary Fig. S2e). Whether this amount *Nanog* is required for islet expansion and  
258 propagation in vitro, and whether it has cancer potential require further investigation. This  
259 observation indicated that in vitro expanded islets underwent certain dedifferentiation.  
260 However, we doubt that the islet clusters gained proliferation ability through this  
261 dedifferentiation. Further experiments with withdrawal of key chemicals in the medium will  
262 test this hypothesis. For clinical usage, the in vitro expansion of 100 patient islets to 1 million  
263 islets without significant gene mutations, while preserving pancreatic islet function, and  
264 transferring them back to the patient to recover glucose homeostasis is ideal. However, the  
265 current approach of PIEM allows only 5~8-fold growth of approximately 5%-15% of isolated  
266 islet clusters. The expansion of the islet clusters was only observed in the first passage.  
267 Therefore, it is unlikely to cause significant genomic instability. However, the current  
268 acquired in vitro expanded islet cluster cells do not contain sufficient amounts for RNA-seq to  
269 verify the gene expression profile or transplantation to confirm their in vivo functions. More  
270 important, the final usage of in vitro propagated islet clusters for regenerative therapy to treat  
271 diabetes in general require millions of pancreatic islets. Therefore, a future revision of the  
272 current PIEM composition and method for in vitro islet propagation is in an urgent demand.

273 One of the future directions for the optimization of in vitro islet propagation methods could  
274 be as follows: (1) initial expansion and dedifferentiation of islet clusters to islet  
275 progenitor-like cell clusters, (2) rapid proliferation of islet progenitor-like cell clusters to a  
276 sufficient amount, (3) differentiation of progenitor-like cell clusters to functional integral  
277 islets, (4) transplantation or (5) exploitation of these expanded islet tissues for drug tests.  
278 Therefore, manifesting the markers for each stage and searching chemicals that are useful for  
279 each procedure in the above protocol is our next goal to fulfil expanded islet clusters  
280 regeneration in vitro in the future.

281 Taken together, we have developed a recipe for PIEM, and our 3D culture method enabled  
282 the initial generation of expanded islet clusters via the in vitro expansion of isolated islet  
283 clusters from pregnant mice or wild-type rats in the first passage. Our study is one important  
284 step forward for the realization of a method to fulfil in vitro propagation of pancreatic islet in  
285 vitro, which may facilitate new therapies development to treat diabetes.

286  
287



288 **Materials and methods**

289

290 **Animals**

291 C57BL/6 mice and rats of Wistar strain were housed and bred under specific-pathogen-free  
292 conditions at Shandong University animals care facility. Female animals were used. The  
293 numbers of animals are indicated in the figure legends within each experiment. All animal  
294 care and experiments were reviewed and approved by the Animal Use Committee of  
295 Shandong University School of Medicine.

296

297 **Pancreatic islet isolation and digestion into single cells or cell clusters.**

298 We isolated pancreatic islets from C57BL/6 mice, pregnant C57BL/6 mice and Wistar rat.  
299 Briefly, mice and rat were killed by cervical dislocation and then pancreas were isolated from  
300 them individually. Adult pancreas were digested by Collagenase P (Roche, 11213873001) at  
301 37°C for 18-25 minutes. Digestion was stopped by cold Hank's balanced salt solution (136.9  
302 mM NaCl; 5.4 mM KCl; 1.3 mM CaCl<sub>2</sub>; 0.8 mM MgSO<sub>4</sub>; 0.44 mM KH<sub>2</sub>PO<sub>4</sub>; 0.34 mM  
303 Na<sub>2</sub>HPO<sub>4</sub>; 5.55 mM D-glucose; 4.4 mM NaHCO<sub>3</sub>, pH=7.4) followed by sedimentation for  
304 three or five times at 4°C. The islets were collected by hand picking using a stereomicroscope  
305 and were cultured overnight in islet complete media containing 5.6 mM glucose (Biological  
306 Industries), 10% FBS (Gibco), 0.1% penicillin/streptomycin. Next we obtained single cells and  
307 cell clusters of different diameters (20-150µm) under the microscope by controlling enzyme  
308 concentration, digestion and settling time. Islets briefly after naturally settling for 1 minute in  
309 KRBB buffer (135 mM NaCl; 4.7 mM KCl; 1.2 mM KH<sub>2</sub>PO<sub>4</sub>; 10 mM Hepes; 3 mM  
310 D-glucose; 5 mM NaHCO<sub>3</sub>; 0.1% BSA; 1% penicillin/streptomycin, pH=7.4), preheated  
311 EDTA-KRBB solution was added, gently piped for 2 min, then placed in a 33°C water bath for  
312 10 min; after clearing the supernatant, digested with dispase II (0.1-0.5 U/ml, Roche,  
313 04942078001) in a 33°C water bath for 3~8 min to obtain single cells or islet cell clusters.  
314 Mechanical fragmentation was achieved by gentle pipetting (5-10 times) with a glass dropper  
315 in a 15ml glass centrifuge tube. Using DMEM/F-12 (Biological Industries) medium with 10%  
316 FBS (Gibco) and 1% penicillin/streptomycin for termination of digestion. Collecting single  
317 cells or cell clusters by centrifugation (300×g, 5 min, Room temperature).

318

319 **Production of Rspo1-conditioned medium**

320 The RSPO1 conditioned medium is home-made and will be described in other papers.

321

322 **Expanded islet clusters culture**

323 Isolated islet cell clusters were washed twice with DMEM/F-12 (Biological Industries),  
324 counted and mixed with Matrigel in glass centrifuge tubes. 30,000–50,000 cells or 10-20 cell  
325 clusters were used per well of a pre-warmed 24-well plate (the volume of 50  $\mu$ l). After  
326 Matrigel was solidified for 30min at 37 $^{\circ}$ C, pancreatic islet expansion medium (PIEM) was  
327 added. PIEM consists of DMEM/F-12 (1% GlutaMax, 1% Penicillin-Streptomycin) plus 15%  
328 RSPO1 conditioned medium (home-made), 3  $\mu$ M CHIR-99021 (BioGems), 1  $\mu$ M A83-01  
329 (Adooq Bioscience), 10 nM gastrin-1 (MedChemExpress), 1.25 mM N-acetylcysteine  
330 (Sigma), 10  $\mu$ M Y-27632 (Adooq Bioscience), 10  $\mu$ M forskolin (TargetMol), 50 ng/ml  
331 Exendin-4 (ChinaPeptides), 50  $\mu$ g/ml L-Ascorbic acid (Sigma), 250 nM 5-Iodotubercidin  
332 (Adooq Bioscience), 50 ng/ml FGF10 (PeproTech), 50 ng/ml EGF (PeproTech), 10 mM  
333 Nicotinamide (Sigma), B27 Supplement (minus Vitamin A) (Thermo). Cultures were kept at  
334 37 $^{\circ}$ C, 5% CO<sub>2</sub> in a humidified incubator. During culturing, medium was refreshed every three  
335 days.

336

337 **RNA extraction and qRT-PCR.**

338 RNA from islets and islet single cells as well as islet cell clusters derived from C57BL/6  
339 mice, pregnant C57BL/6 mice and Wistar rat, including the corresponding islet clusters were  
340 extracted with TRIzol reagent (Thermo). We used the tip to pick up the expanded islet clusters  
341 from the Matrigel using a stereomicroscope. Cell Recovery Solution(Corning) is used to  
342 recover cells from Matrigel. Add 0.2-0.5 ml per 24-well plate cold Cell Recovery Solution.  
343 Scrape the gel layer into a cold 1.5 ml Microcentrifuge Tube and leave it on ice for 0.5-1 hour  
344 until the gel complete dissolved. Collecting cells by centrifugation (200 $\times$ g, 5 min, 4 $^{\circ}$ C). And  
345 we used TURBO DNA-free TMKit (Invitrogen) to remove DNA contamination from the  
346 extracted RNA. cDNA synthesis using the qRT-PCR Kit (Toyobo, FSQ-101). We conducted  
347 quantitative reverse-transcriptase PCR (qRT-PCR) in the LightCyclerqPCR apparatus  
348 (Bio-Rad) with the FastStart SYBR Green Master (Roche). All primers used for qRT-PCR  
349 assay are listed in Supplementary Table S1.

350

351 **Immunofluorescence staining**

352 Expanded islet clusters were harvested using cell recovery solution (Corning, 354253) and  
353 fixed in 4% paraformaldehyde for 30 min at room temperature, followed with blocking and

354 permeabilizing in PBS with 0.5% Triton X-100 (Solarbio, T8200) and 5% donkey serum  
355 (Solarbio, SL050) for 30min at room temperature. Then, samples were incubated with  
356 primary antibody at 4°C overnight, followed by incubation with secondary antibody for 2h at  
357 room temperature. DAPI (Beyotime, C1002) was used to stain the nucleus and find islets. The  
358 following antibodies were used for immunofluorescence: anti-INSULIN (1:200, sc-9168;  
359 Santa), anti-SOMATOSTATIN (1:600, ab30788; Abcam), anti-GLUCAGON (1:200, G2654;  
360 Sigma). anti-PDX1 (1:200, ab47267; abcam), anti-SOX9 (1:200, ab185966; abcam),  
361 anti-NKX6.1 (1:200, ab221549; abcam), anti-MAFA (1:200, ab26405; abcam), anti-KI67  
362 (1:200, D3B5; Cell Signaling Technology). Expanded islet clusters imaging was performed  
363 on Zeiss LSM 780 and processed using ImageJ or Adobe illustrator software.

364

#### 365 **Insulin secretion measurement**

366 The insulin secretions were performed similar to previously described in our group<sup>7,9,24</sup>.  
367 Fifty day 7 expanded islet clusters (cell number is comparable to 1/10 of primarily isolated  
368 islets, 1,000~2,000 cells) or ten islets for each group were starved in 2.8 mM glucose  
369 MKRBB buffer (5 mM KCl, 120 mM NaCl, 15 mM Hepes, 24 mM NaHCO<sub>3</sub>, 1 mM MgCl<sub>2</sub>, 2  
370 mM CaCl<sub>2</sub>, pH=7.4) for 1 hour at 37°C, and then treated with 20 mM glucose and 100 nM  
371 GLP1, whereas the control groups were treated with 2.8 mM glucose for 30 min. The  
372 supernatant fractions were collected to measure the secreted insulin. The insulin levels were  
373 measured with the Millipore Rat / Mouse Insulin (Cat. # EZRMI-13K), as what indicated by  
374 the manufacturer's instructions.

375

#### 376 **Somatostatin measurement**

377 The somatostatin secretions were performed similar to previously described in our  
378 group<sup>7,9,24</sup>. Fifty day 7 expanded islet clusters or ten primary islets for each group were  
379 starved in 1 mM glucose MKRBB buffer for 1 hour at 37°C, then treated with 20 mM glucose  
380 and 100 nM UCN3, whereas the control groups were treated with 1 mM glucose for 1 hour.  
381 The supernatant fractions were collected for somatostatin measurement using the Phoenix  
382 Pharmaceuticals ELISA kit (EK-060-03), as what indicated by the manufacturer's  
383 instructions.

384

### 385 **Glucagon measurement**

386 The glucagon secretions were performed similar to previously described in our group<sup>7,9,24</sup>.  
387 Fifty day 7 expanded islet clusters or ten primary islets for each group were starved in 12 mM  
388 glucose MKRBB buffer for 1 hour at 37°C, and then treated with 1 mM glucose and 25 mM  
389 Arginine, whereas the control groups were treated with 5 mM Arginine for 1 hour. The  
390 supernatant fractions were collected to measure the secreted glucagon. The glucagon levels  
391 were measured with the Cloud-Clone Corp Mouse Glucagon (Cat. CEB266Mu), as what  
392 indicated by the manufacturer's instructions.

393

### 394 **Statistical analysis**

395 All the qRT-PCR data were performed independently for at least three times. Statistical  
396 analyses were performed using GraphPad Prism 7 software. Experimental data were  
397 performed using unpaired two-tailed Student's t-test. Results are presented as mean ± SEM; P  
398 < 0.05 was considered statistically significant.

399

### 400 **Acknowledgements**

401 This work was supported by funding from the National Science Fund for Excellent Young  
402 Scholars Grant (81822008 to X.Y.), the National Natural Science Foundation of China  
403 (31671197 to X.Y., 81773704 to J.-P.S., 31970779 to H.-L.H., and 81173086 to J.A.),  
404 National Key Research and Development Program of China (2019YFA0111400 to H.-L.H.),  
405 and the Shandong Key Research and Development Program (2017GSF18138 to J.A.).

406

### 407 **Conflict of interest**

408 The authors declare that they have no conflict of interest.

409

### 410 **Author contributions**

411 X.Y. started the idea for in vitro expansion of islet tissues since 2010. X.Y. and J.-P.S.  
412 supervised the overall project design and execution. H.-L.H. provided key experience and  
413 protocols for in vitro 3D tissue culture and initial components advices. X.Y., J.-P.S. and  
414 H.-L.H. initiated the project. J.-P.S. organized the screening idea. X.Y., J.-P.S. and J.-Y.L.  
415 designed the screening details for chemicals and other factors. X.Y., J.-P.S., J.-Y.L. and J.C.  
416 designed the cell culture and all other experiments. J.-Y.L., J.C., Y.-Q.D., W.P., X.Y. and  
417 J.-P.S. participated in data analysis and interpretation. Z.Z., Y.-Q.D. and R.-J.C. provided the

418 new material preparation methods. J.W., Z.Y., F.Y. and J.A. provided insightful idea. Y.-F.X.,  
419 H.L., W.-T.A. and J.W. participated in molecular biology and animal experiments. X.Y. and  
420 J.-P.S. wrote the manuscript. H.-L.H., R.-J.C., J.-Y.L., J.C., Y.-Q.D. and W.P. revised  
421 manuscript and provided key insights for discussion.

422

### 423 **Contact for reagent and resource sharing**

424 Further information and requests for resources and reagents should be directed to and will  
425 be fulfilled by the Lead Contact, Professor Xiao Yu (yuxiao@sdu.edu.cn), Jin-Peng Sun  
426 (sunjinpeng@bjmu.edu.cn) or Hui-Li Hu (huhuili@sdu.edu.cn).

427

### 428 **References**

- 429 1. Zhu, S., et al. Human pancreatic beta-like cells converted from fibroblasts. *Nature*  
430 *communications*. **7**, 10080 (2016).
- 431 2. Li, K., et al. Small molecules facilitate the reprogramming of mouse fibroblasts into pancreatic  
432 lineages. *Cell Stem Cell*. **14**, 228-236 (2014).
- 433 3. D'Amour, K.A., et al. Production of pancreatic hormone-expressing endocrine cells from  
434 human embryonic stem cells. *Nature biotechnology*. **24**, 1392-1401 (2006).
- 435 4. Jiang, W., et al. In vitro derivation of functional insulin-producing cells from human  
436 embryonic stem cells. *Cell Res*. **17**, 333-344 (2007).
- 437 5. Lancaster, M.A. & Knoblich, J.A. Organogenesis in a dish: modeling development and disease  
438 using organoid technologies. *Science*. **345**, 1247125 (2014).
- 439 6. Clevers, H. Modeling Development and Disease with Organoids. *Cell*. **165**, 1586-1597 (2016).
- 440 7. Li, Q., et al. A cullin 4B-RING E3 ligase complex fine-tunes pancreatic delta cell paracrine  
441 interactions. *J Clin Invest*. **127**, 2631-2646 (2017).
- 442 8. Dou, H., et al. Calcium influx activates adenylyl cyclase 8 for sustained insulin secretion in rat  
443 pancreatic beta cells. *Diabetologia*. **58**, 324-333 (2015).
- 444 9. Wang, H.M., et al. A stress response pathway in mice upregulates somatostatin level and  
445 transcription in pancreatic delta cells through Gs and beta-arrestin 1. *Diabetologia*. **57**,  
446 1899-1910 (2014).
- 447 10. van der Meulen, T., et al. Urocortin3 mediates somatostatin-dependent negative feedback  
448 control of insulin secretion. *Nat Med*. **21**, 769-776 (2015).
- 449 11. Sato, T., et al. Long-term expansion of epithelial organoids from human colon, adenoma,  
450 adenocarcinoma, and Barrett's epithelium. *Gastroenterology*. **141**, 1762-1772 (2011).
- 451 12. Boj, S.F., et al. Organoid models of human and mouse ductal pancreatic cancer. *Cell*. **160**,  
452 324-338 (2015).
- 453 13. Bartfeld, S., et al. In vitro expansion of human gastric epithelial stem cells and their responses  
454 to bacterial infection. *Gastroenterology*. **148**, 126-136.e126 (2015).
- 455 14. Broutier, L., et al. Culture and establishment of self-renewing human and mouse adult liver  
456 and pancreas 3D organoids and their genetic manipulation. *Nat Protoc*. **11**, 1724-1743  
457 (2016).
- 458 15. Sampaziotis, F., et al. Reconstruction of the mouse extrahepatic biliary tree using primary  
459 human extrahepatic cholangiocyte organoids. *Nature medicine*. **23**, 954-963 (2017).
- 460 16. Hu, H., et al. Long-Term Expansion of Functional Mouse and Human Hepatocytes as 3D

- 461 Organoids. *Cell*. **175**, 1591-1606.e1519 (2018).
- 462 17. Sachs, N., et al. Long-term expanding human airway organoids for disease modeling. *Embo j.*  
463 **38**(2019).
- 464 18. Schutgens, F., et al. Tubuloids derived from human adult kidney and urine for personalized  
465 disease modeling. *Nat Biotechnol*. **37**, 303-313 (2019).
- 466 19. Xiang, C., et al. Long-term functional maintenance of primary human hepatocytes in vitro.  
467 *Science (New York, N.Y.)*. **364**, 399-402 (2019).
- 468 20. Huch, M., et al. Unlimited in vitro expansion of adult bi-potent pancreas progenitors through  
469 the Lgr5/R-spondin axis. *EMBO J*. **32**, 2708-2721 (2013).
- 470 21. Hou, P., et al. Pluripotent stem cells induced from mouse somatic cells by small-molecule  
471 compounds. *Science (New York, N.Y.)*. **341**, 651-654 (2013).
- 472 22. Sorenson, R.L. & Brelje, T.C. Adaptation of islets of Langerhans to pregnancy: beta-cell growth,  
473 enhanced insulin secretion and the role of lactogenic hormones. *Hormone and metabolic  
474 research = Hormon- und Stoffwechselforschung = Hormones et metabolisme*. **29**, 301-307  
475 (1997).
- 476 23. Schraenen, A., et al. mRNA expression analysis of cell cycle genes in islets of pregnant mice.  
477 *Diabetologia*. **53**, 2579-2588 (2010).
- 478 24. Li, N., et al. Ablation of somatostatin cells leads to impaired pancreatic islet function and  
479 neonatal death in rodents. *Cell Death Dis*. **9**, 682 (2018).
- 480 25. Liang, Y.L., et al. Phase-plate cryo-EM structure of a biased agonist-bound human GLP-1  
481 receptor-Gs complex. *Nature*. **555**, 121-125 (2018).
- 482 26. Hu, Q.X., et al. Constitutive Galphai coupling activity of very large G protein-coupled receptor  
483 1 (VLGR1) and its regulation by PDZD7 protein. *The Journal of biological chemistry*. **289**,  
484 24215-24225 (2014).
- 485 27. Huch, M., et al. Long-term culture of genome-stable bipotent stem cells from adult human  
486 liver. *Cell*. **160**, 299-312 (2015).
- 487 28. Staels, W., et al. Conditional islet hypovascularisation does not preclude beta cell expansion  
488 during pregnancy in mice. *Diabetologia*. **60**, 1051-1056 (2017).
- 489 29. Kim, H., et al. Serotonin regulates pancreatic beta cell mass during pregnancy. *Nat Med*. **16**,  
490 804-808 (2010).
- 491 30. Karnik, S.K., et al. Menin controls growth of pancreatic beta-cells in pregnant mice and  
492 promotes gestational diabetes mellitus. *Science (New York, N.Y.)*. **318**, 806-809 (2007).
- 493 31. Zhao, X., et al. Involvement of the STAT5-cyclin D/CDK4-pRb pathway in beta-cell proliferation  
494 stimulated by prolactin during pregnancy. *American journal of physiology. Endocrinology and  
495 metabolism*. **316**, E135-e144 (2019).

496

## 497 **Figure legends**

498 **Fig. 1 Flowchart for the development of the medium recipe used for pancreatic islet**  
499 **expansion.**

500  
501 The chemicals and hormones used in previous studies for stem cell expansion, differentiation  
502 and pancreatic islet cell conversion (upper panel) are classified by their reported function  
503 related to cell division and proliferation, islet identity, and cell renewal and regeneration

504 (middle panel). The common factors are summarized and combined for the formulation of the  
505 medium recipe used for in vitro pancreatic islet cluster expansion.

506

507 **Fig. 2 In vitro expansion of pregnant mouse islet clusters.**

508 **a** Representative images of single islet cells or islet clusters (approximately 6,000-9,000  $\mu\text{m}^2$   
509 original surface area) derived from pregnant mice after 3D culture in pancreatic islet cluster  
510 expansion medium (PIEM) at the indicated time points. Experiments were performed on  
511 pregnant mice. The scale bar in the single-cell image represents 50  $\mu\text{m}$ , and one in the cluster  
512 image represents 100  $\mu\text{m}$ .

513 **b** Representative images of dispersed wild-type mouse islet single cells or clusters at various  
514 times after 3D culture with PIEM. The scale bar in the single-cell image represents 50  $\mu\text{m}$ ,  
515 and one in the cluster image represents 100  $\mu\text{m}$ .

516 **c** Numbers of expanded clusters per 100 islet cell clusters. The experiments were performed  
517 in triplicate and with pregnant mice. The data are represented as the mean  $\pm$  SEM.

518 **d** Numbers of expanded clusters per 100 islet cell clusters. The experiments were performed  
519 in triplicate on wild-type mice. The data are represented as the mean  $\pm$  SEM.

520 **e** Comparison of islet cell identity marker expression in pregnant mouse pancreatic islet  
521 clusters vs. isolated primary mouse islets. \*,  $p < 0.05$ ; \*\*,  $p < 0.01$ ; \*\*\*,  $p < 0.001$ ; clusters  
522 were compared with primary mouse islets. The data are shown as the mean  $\pm$  SEM of at least  
523 three independent experiments. The data statistics were analysed using an unpaired two-tailed  
524 Student's t-test.

525

526 **Fig. 3 Immunostaining for pancreatic islet cell markers and functional**  
527 **examination of in vitro expanded pancreatic islet clusters.**

528 **a** Immunofluorescence staining for INSULIN and GLUCAGON in expanded pancreatic islet  
529 clusters derived from pregnant mice; the scale bar represents 50  $\mu\text{m}$ .

530 **b** Immunofluorescence staining for INSULIN and SOMATOSTATIN in expanded pancreatic  
531 islet clusters derived from pregnant mice; the scale bar represents 50  $\mu\text{m}$ .

532 **c** Cell composition of expanded pancreatic islet clusters. Error bars represent mean  $\pm$ SD  
533 (n=3)

534 **d** Immunofluorescence staining for INSULIN and PDX1 in expanded pancreatic islet clusters  
535 derived from pregnant mice; the scale bar represents 50  $\mu\text{m}$ .

536 **e** Immunofluorescence staining for INSULIN and MAFA in expanded pancreatic islet clusters  
537 derived from pregnant mice; the scale bar represents 50  $\mu\text{m}$ .

538 **f** Immunofluorescence staining for INSULIN and NKX6.1 in expanded pancreatic islet  
539 clusters derived from pregnant mice; the scale bar represents 50  $\mu\text{m}$ .

540 **g** Insulin secretion of primary islets or expanded islet clusters treated with 20 mM glucose and  
541 100 nM glucagon peptide 1 (GLP-1) were measured for 30 minutes. The control groups were  
542 treated with 2.8 mM glucose. \*\*\*,  $p < 0.001$ , stimulation groups were compared with control  
543 groups. ###,  $p < 0.001$ , expanded islet clusters were compared with primary islets.

544 **h** Somatostatin secretion of primary islets and expanded islet clusters treated with 20 mM  
545 glucose and 100 nM UCN3 were measured for 1 hour. The control groups were treated with 1  
546 mM glucose. \*\*,  $p < 0.01$ , stimulation groups were compared with control groups. NS, no  
547 significance, expanded islet clusters were compared with primary islets.

548 **i** Glucagon secretion of primary islets and expanded islet clusters treated with 25 mM  
549 Arginine were measured for 1 hour. The control groups were treated with 5mM Arginine. \*\*\*,  
550  $p < 0.001$ , stimulation groups were compared with control groups. NS, no significance,  
551 expanded islet clusters were compared with primary islets.

552 The data are shown as the mean  $\pm$  SEM of at least three independent experiments. The data  
553 statistics were analysed using an unpaired two-tailed Student's t-test.

554

555 **Fig. 4 In vitro expansion of rat islet clusters.**

556 **a** Representative images of rat islet single cells or clusters (approximately 5,000-8,000  $\mu\text{m}^2$   
557 original surface area) at various times after 3D culture with PIEM. The scale bar in the  
558 single-cell image represents 50  $\mu\text{m}$ , and one in the cluster image represents 82.5  $\mu\text{m}$ .

559 **b** Numbers of expanded clusters per 100 islet cell clusters. The experiments were performed  
560 on rats in triplicate. The data are represented as the mean  $\pm$  SEM.

561 **c** Comparison of the expression of islet cell identity markers in rat expanded clusters  
562 compared with primary islets. \*,  $p < 0.05$ ; \*\*,  $p < 0.01$ ; clusters were compared with primary  
563 rat islets. The data are shown as the mean  $\pm$  SEM of at least three independent experiments.  
564 The data statistics were analysed using an unpaired two-tailed Student's t-test.

565

566 **Fig. 5 qRT-PCR analysis of gene expression in expanded clusters compared to primary**  
567 **islets.**

568 **a** Comparison of the expression of proliferation and cell cycle markers in pregnant mouse  
569 expanded clusters vs. isolated primary islets.

570 **b** Comparison of the expression of pluripotency and regeneration markers in pregnant mouse  
571 expanded clusters vs. isolated primary islets.

572 **c** Comparison of the expression of islet and pancreatic progenitor markers in pregnant mouse  
573 expanded clusters vs. isolated primary islets.

574 **d** Comparison of the expression of proliferation and cell cycle markers in rat expanded  
575 clusters vs. isolated primary islets.

576 **e** Comparison of the expression of pluripotency and regeneration markers in rat expanded



577 clusters vs. isolated primary islets.

578 **f** Comparison of the expression of islet and pancreatic progenitor markers in rat expanded  
579 clusters vs. isolated primary islets.

580 \*,  $p < 0.05$ ; \*\*,  $p < 0.01$ ; \*\*\*,  $p < 0.001$ ; clusters were compared with primary islets. The data  
581 are shown as the mean  $\pm$  SEM of at least three independent experiments. The data statistics  
582 were analysed using an unpaired two-tailed Student's t-test.

583

584 **Fig. 6 Essential roles of FSK and exendin4 in in vitro pancreatic islet expansion.**

585 **a-d** qRT-PCR analysis of the expression of islet cell identity markers (**a**), proliferation and  
586 cell cycle markers (**b**), pluripotency and regeneration markers (**c**) and islet and pancreatic  
587 progenitor markers (**d**) in pregnant mouse clusters after 3 days of culture with PIEM or PIEM  
588 without forskolin or exendin4.

589 \*,  $p < 0.05$ ; \*\*,  $p < 0.01$ ; \*\*\*,  $p < 0.001$ ; cell clusters cultured in PIEM without FSK or  
590 exendin4 were compared with those cultured in complete PIEM. The data are shown as the  
591 mean  $\pm$  SEM of at least three independent experiments. The data statistics were analysed  
592 using an unpaired two-tailed Student's t-test.

593

594 **Fig. 7 Scheme of the current approach and future direction.**

595 Schematic depicting the isolation, seeding and the expansion of primary islet cell clusters.  
596 After the islets were isolated from pregnant mice or wild-type rats, the islets were digested  
597 into appropriate cell clusters by incubation with the dispase II. The digestion time were  
598 optimized and the mechanical blow force was used for clusters generation. These clusters  
599 were cultured 3D in PIEM to achieve the in vitro expansion of the islet cell clusters.

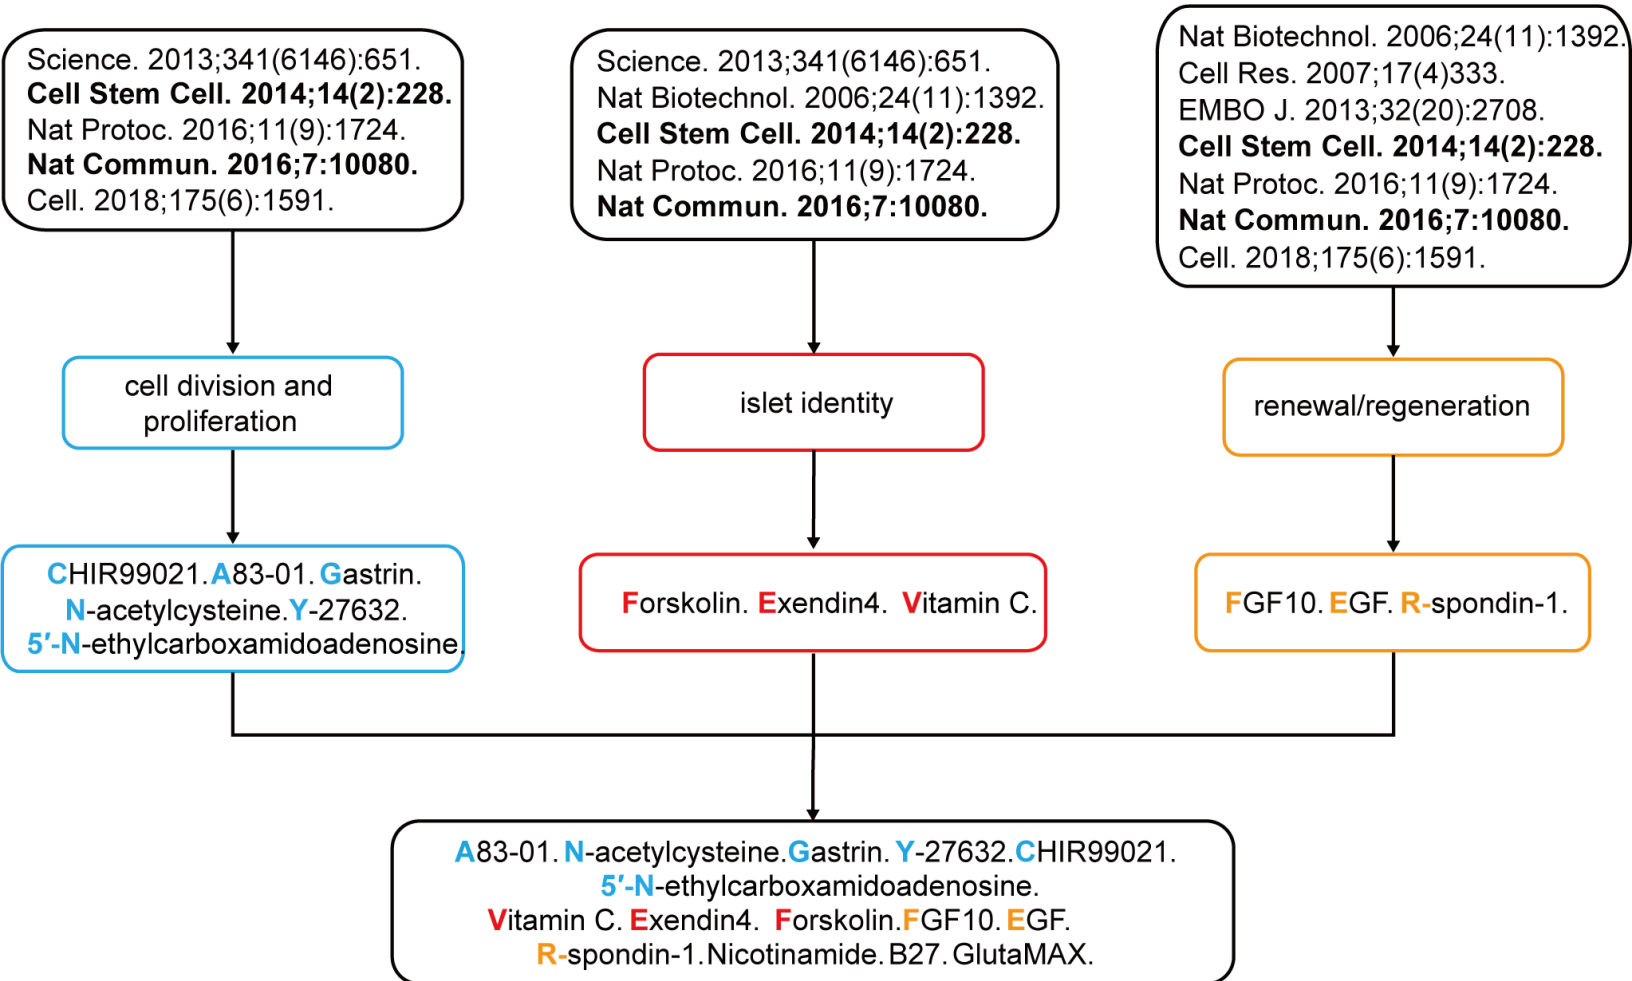

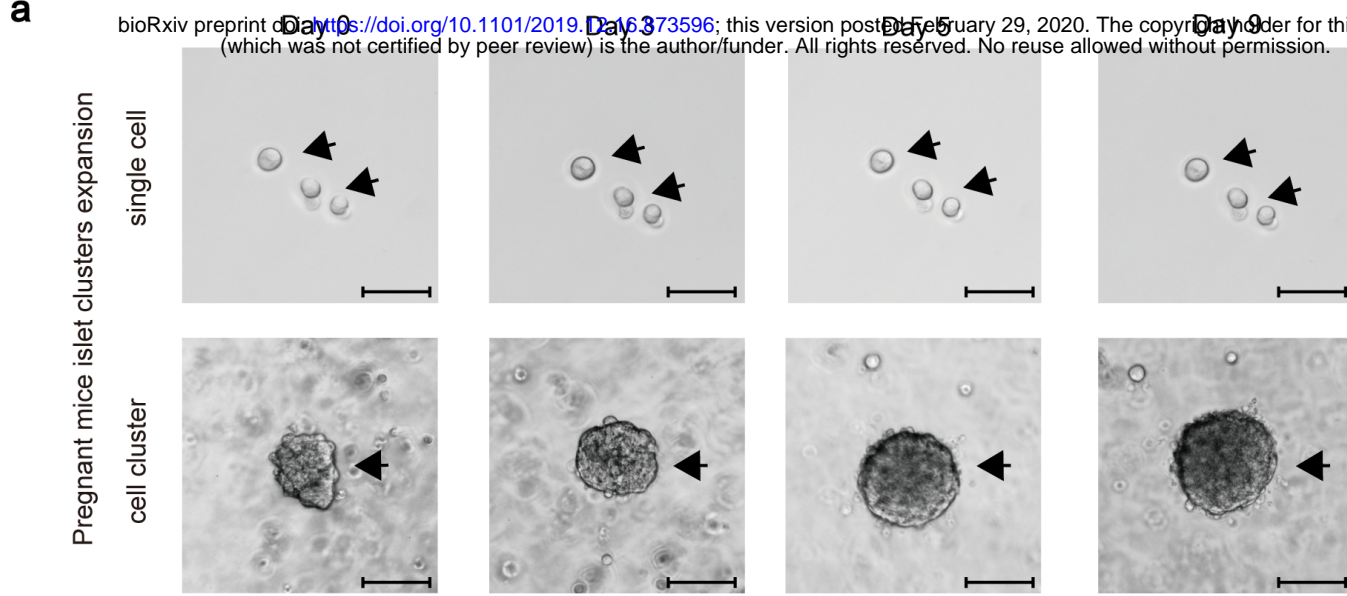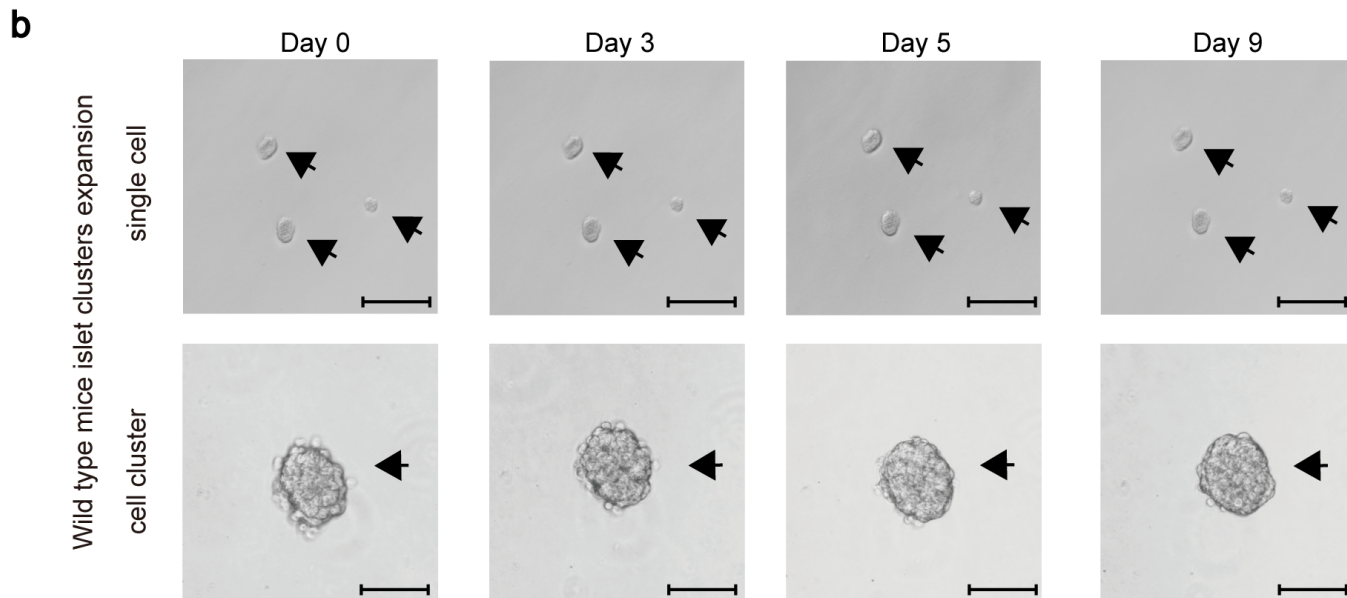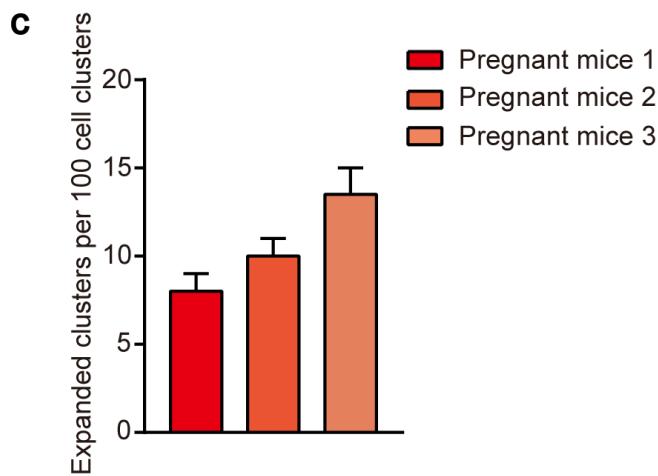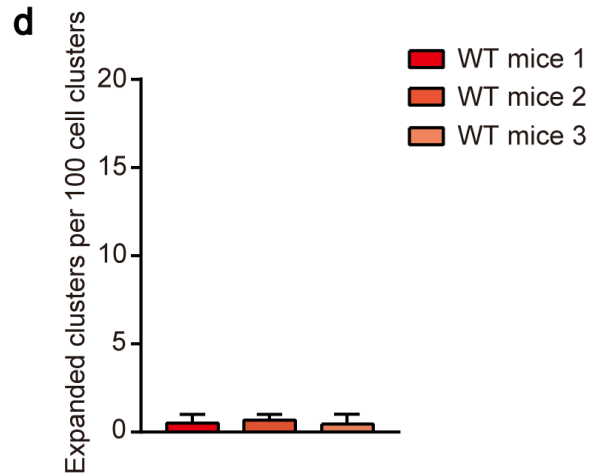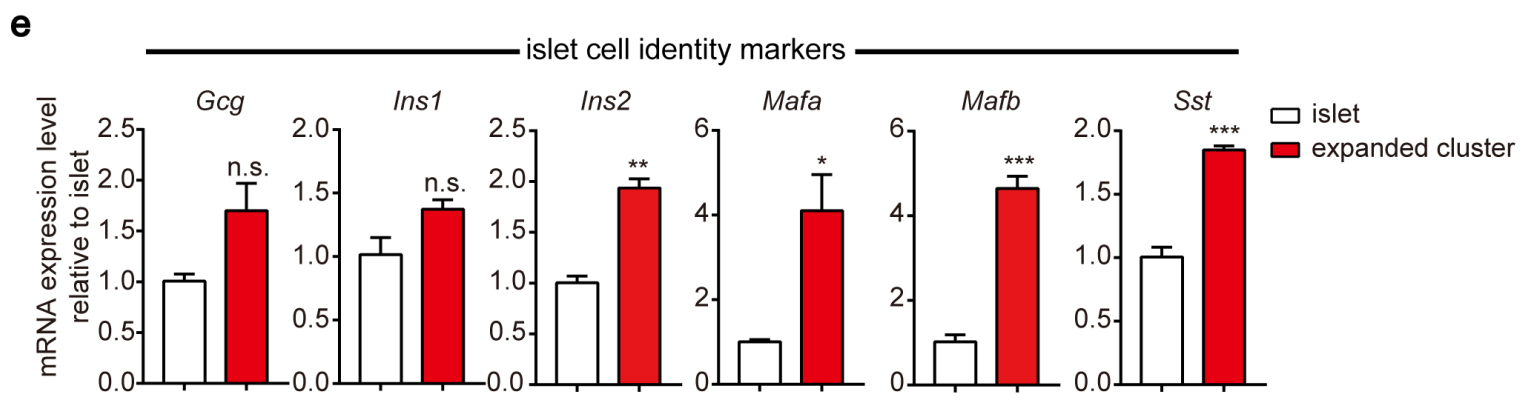

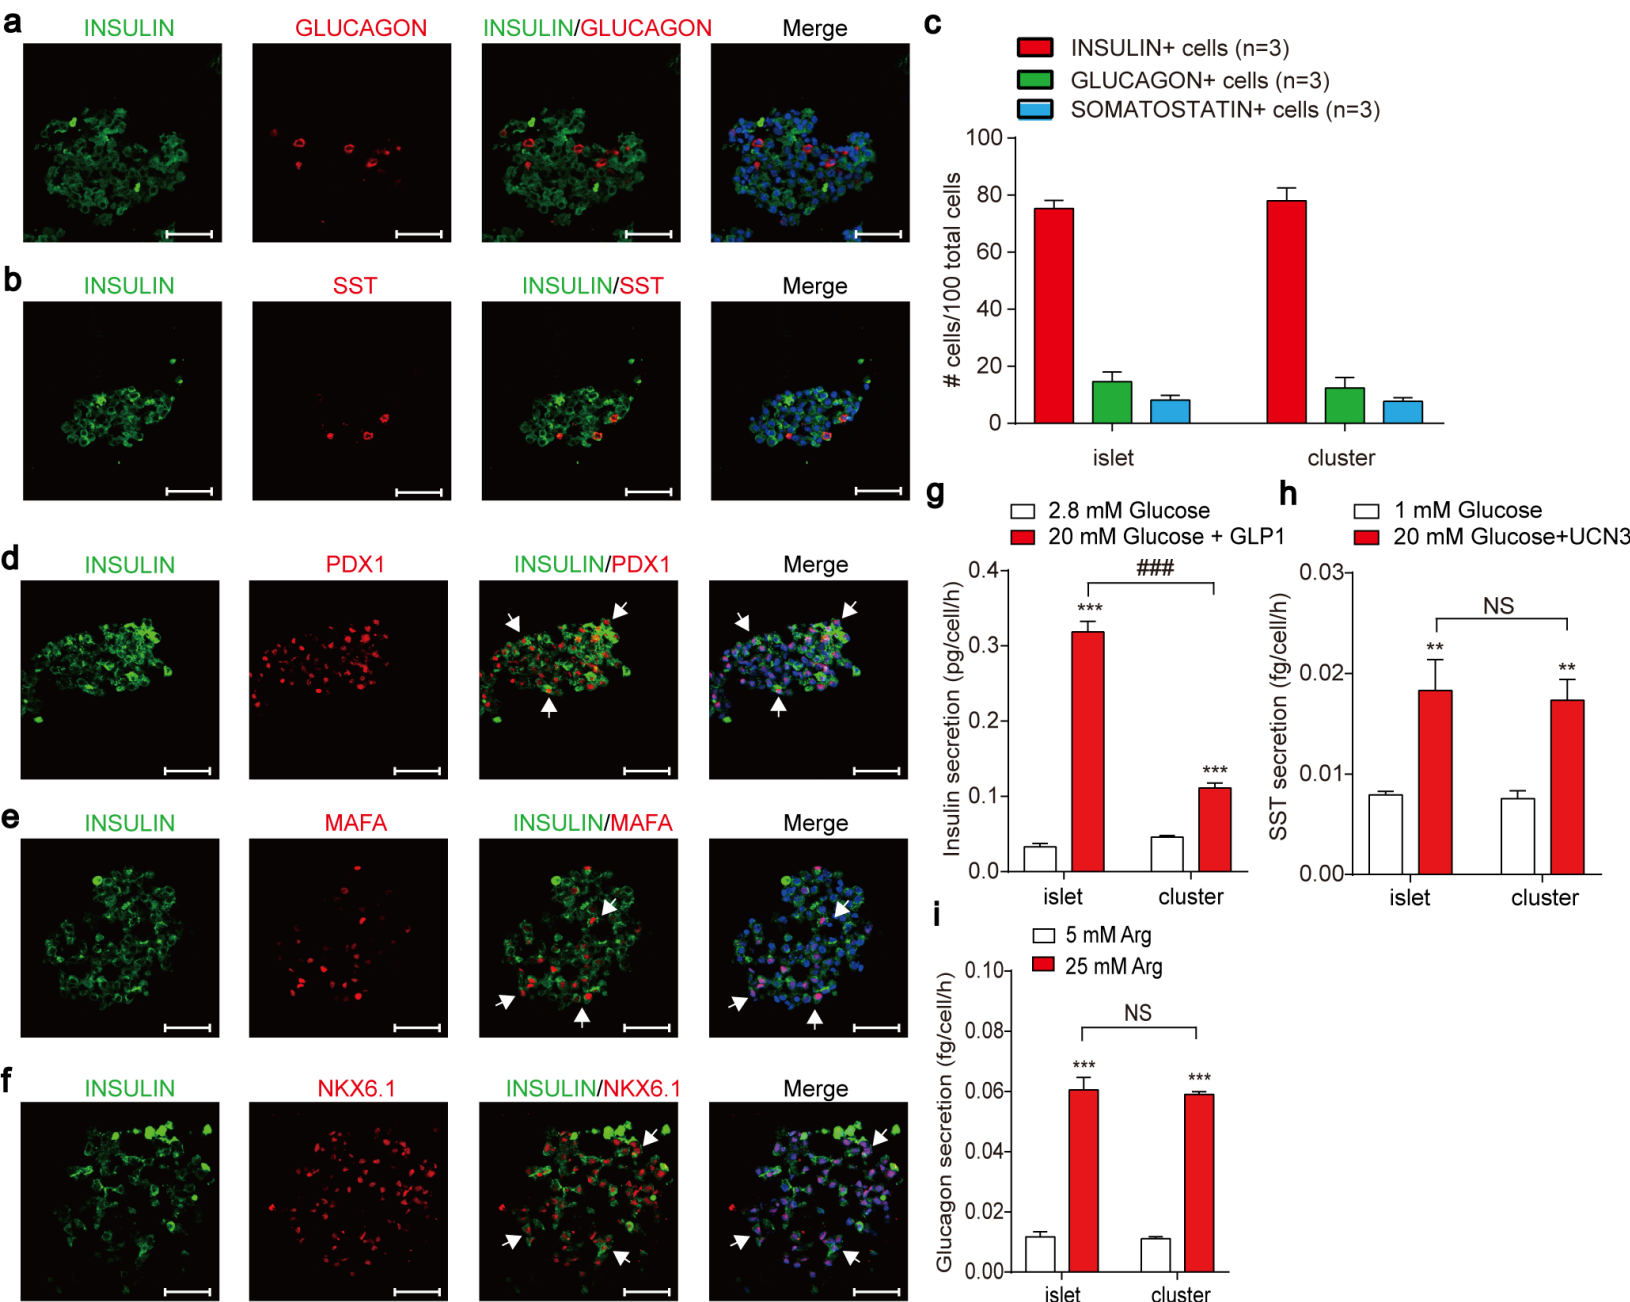

**a**

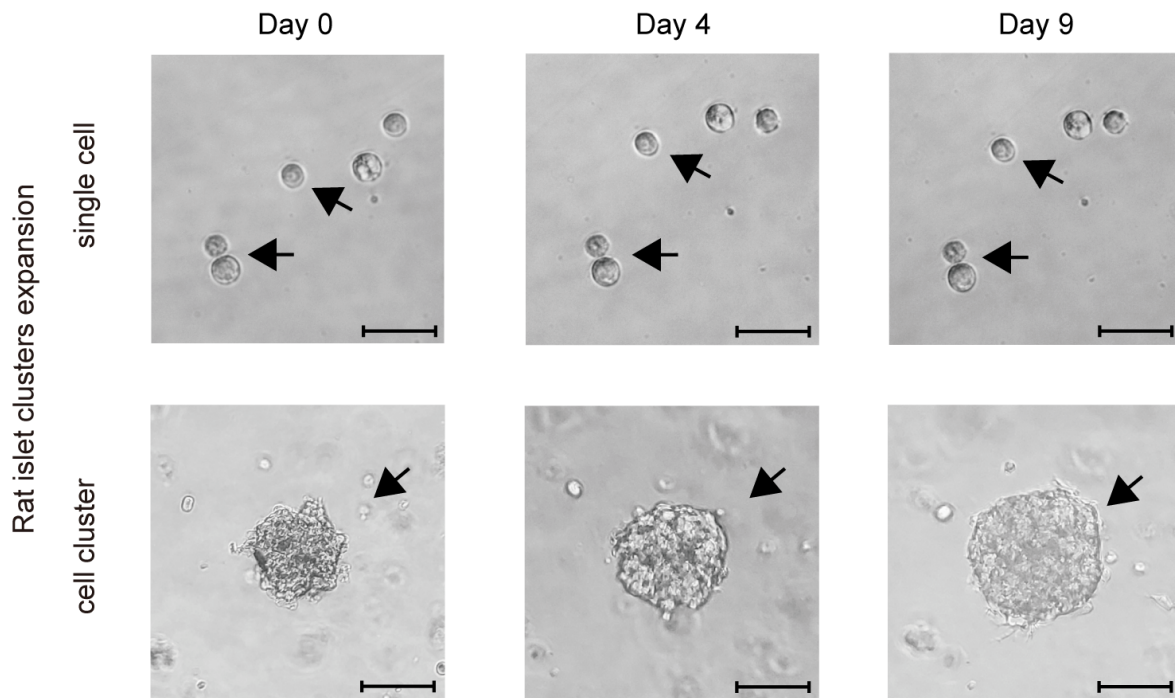

**b**

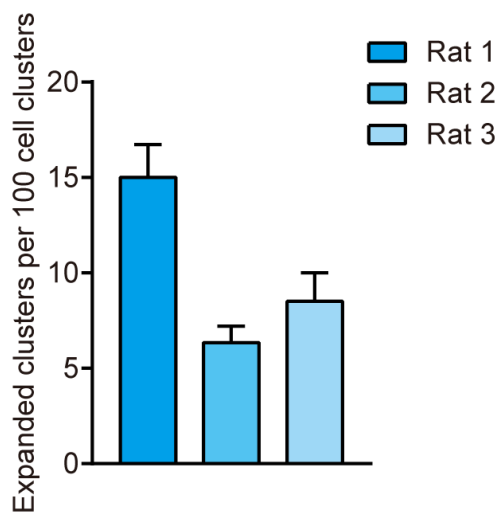

**c**

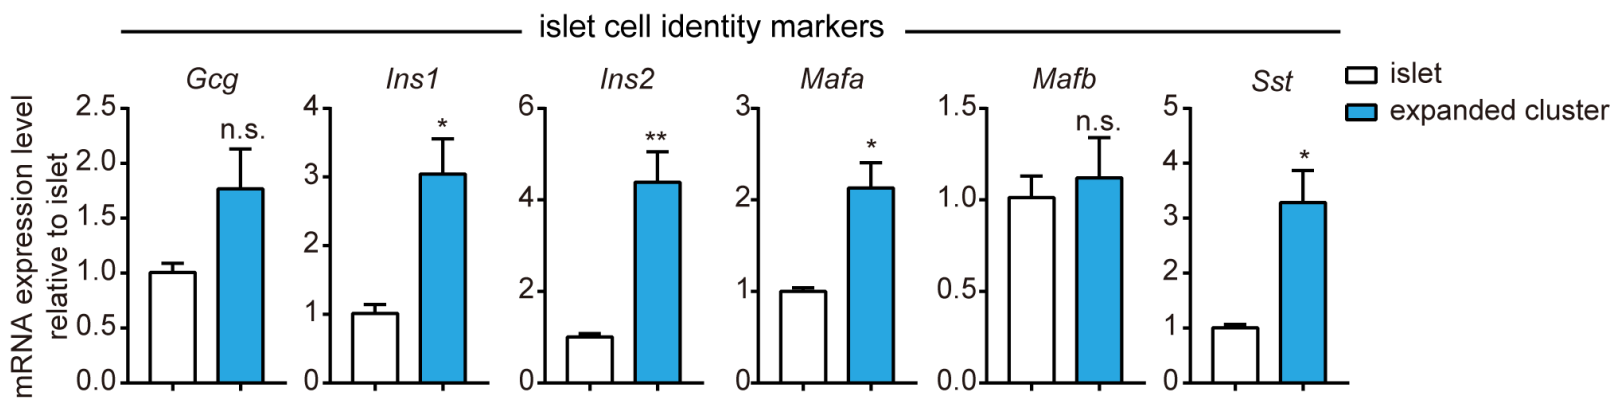

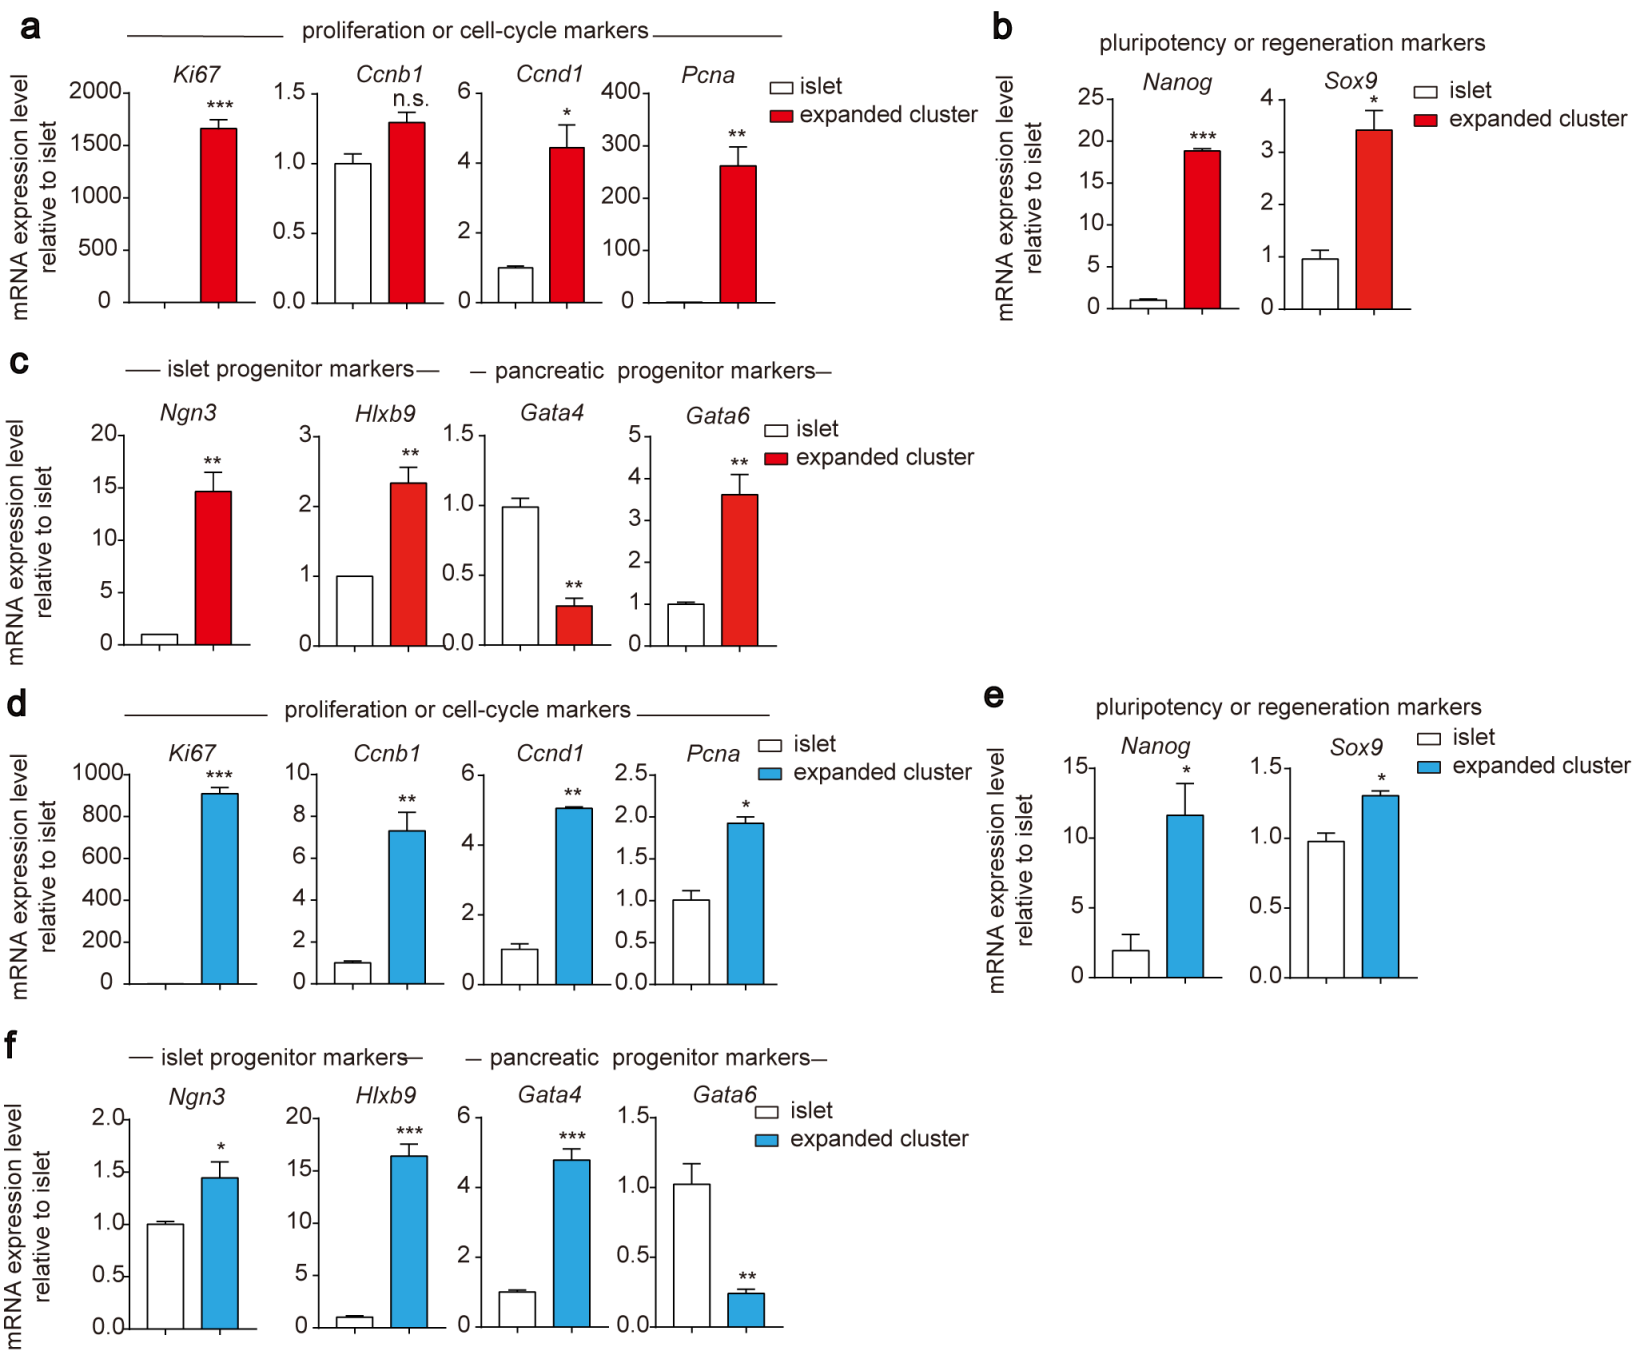

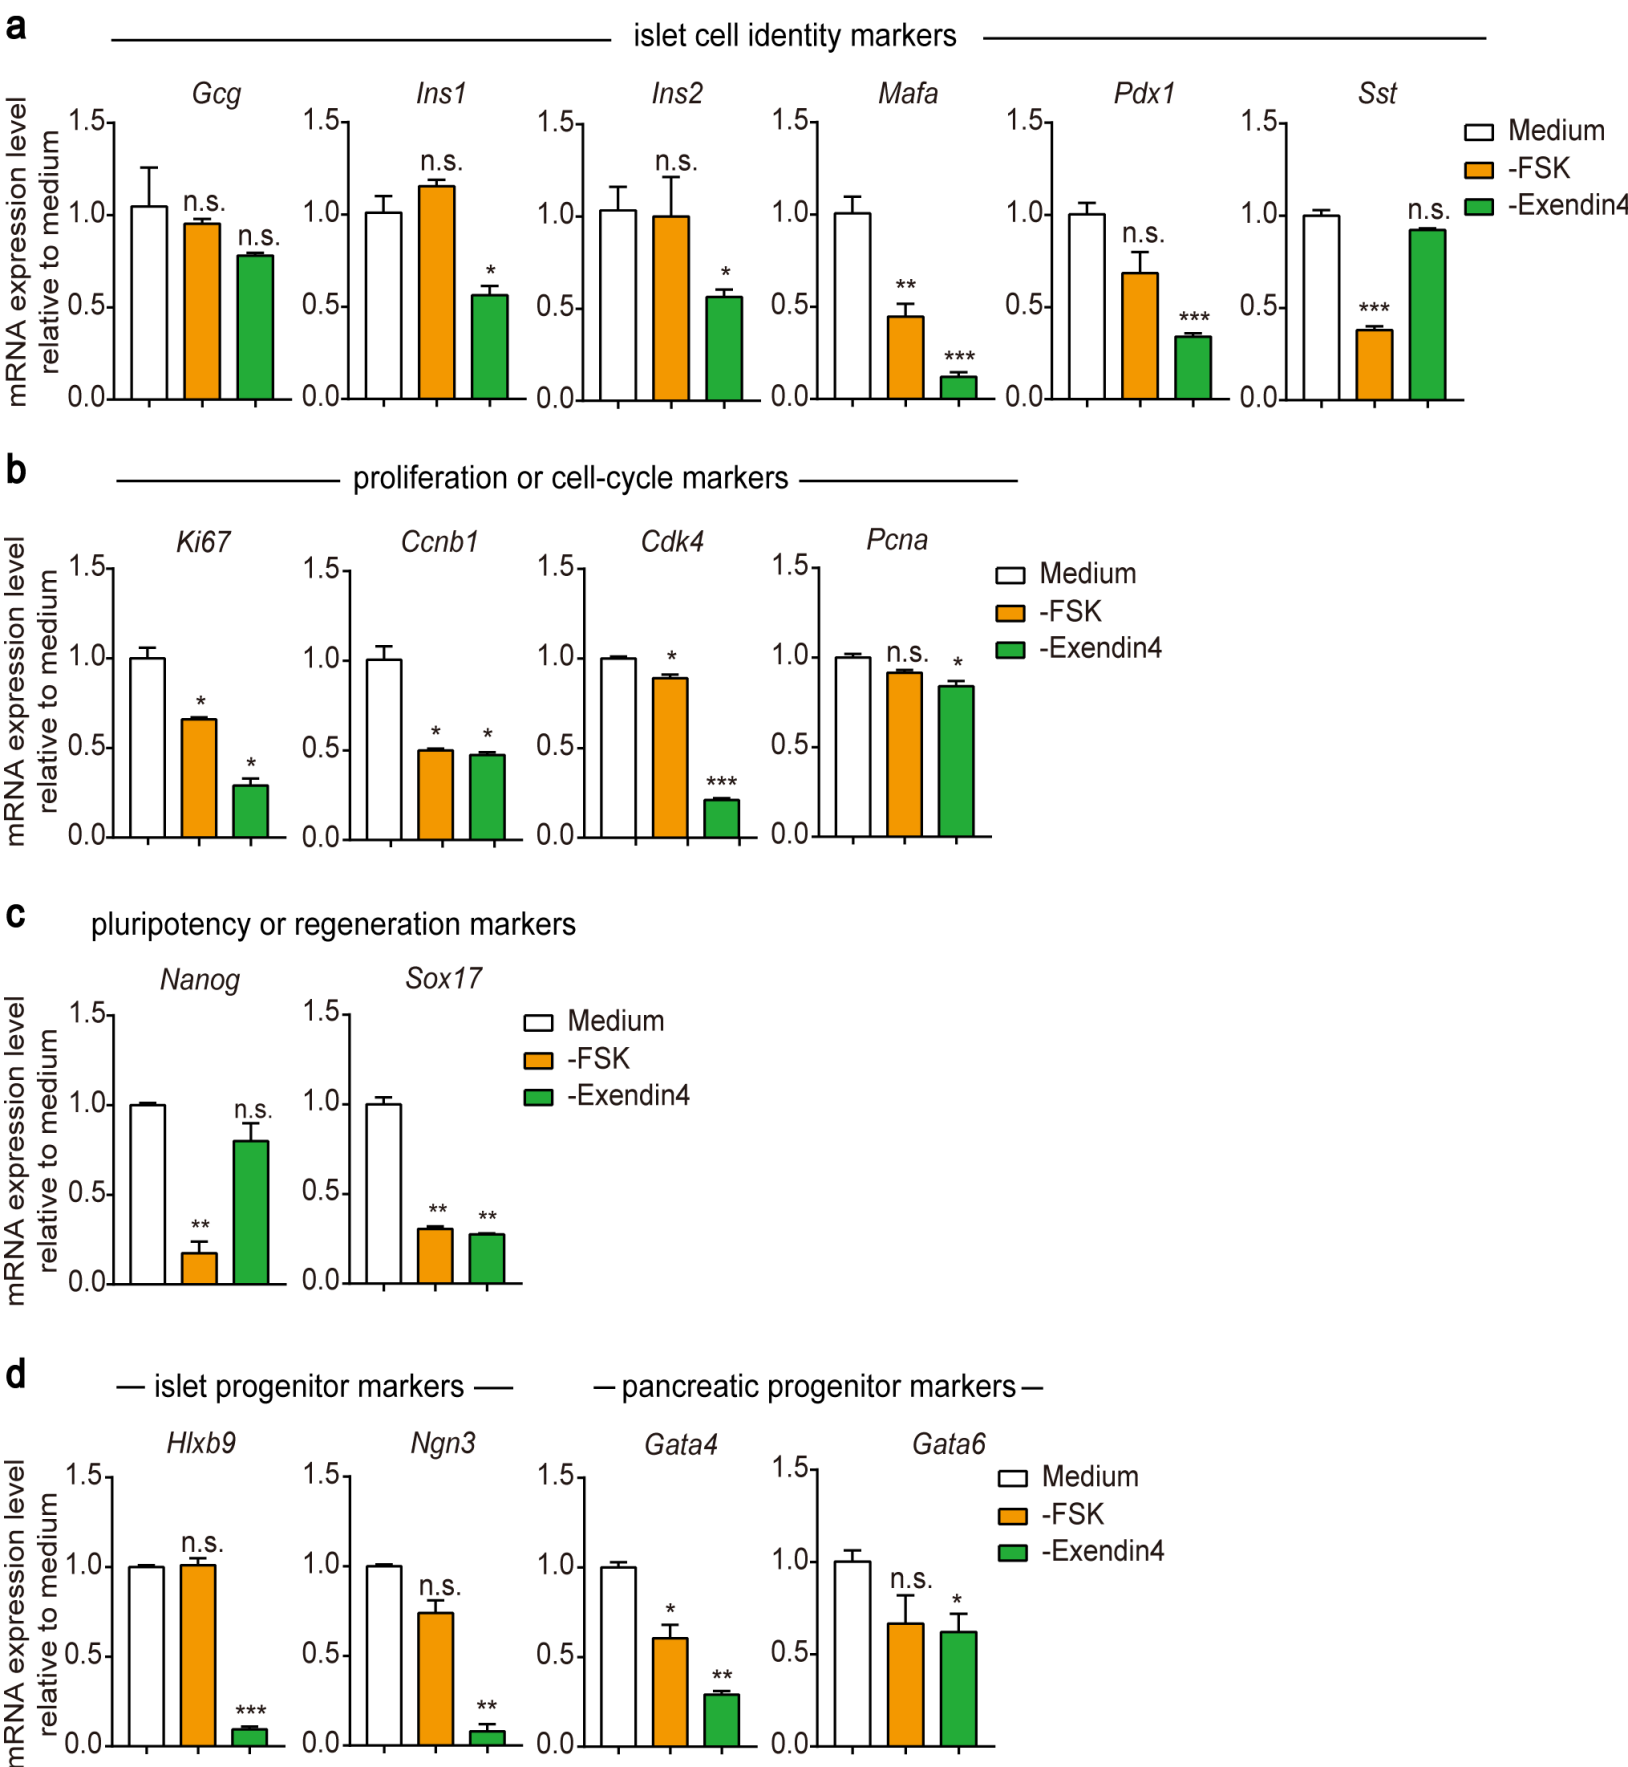

## PIEM

Pregnant mice/wild type rats      Islets      Cell clusters      3D culture      Expanded islet clusters

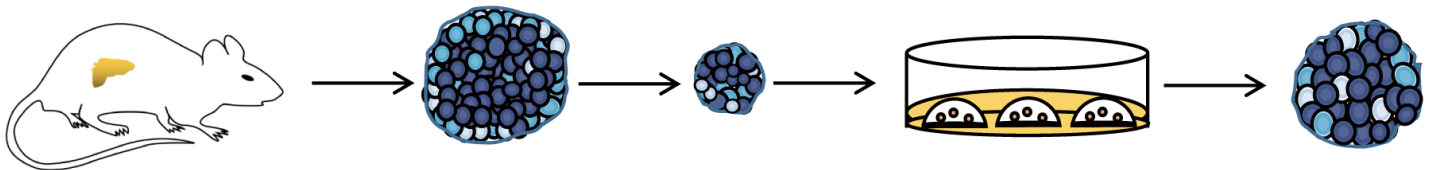

|—Pancreatic islet isolation—|—Digesting—|—Seeding—|—Expansion—|→
